# Supplementary material
Source: Springer Nature journal article supplement (https://www.springermedizin.de/resource/supplementary/12889_2012_5215_MOESM2_ESM.pdf/9494652)
Supplement: MOESM2 [file 9494652]

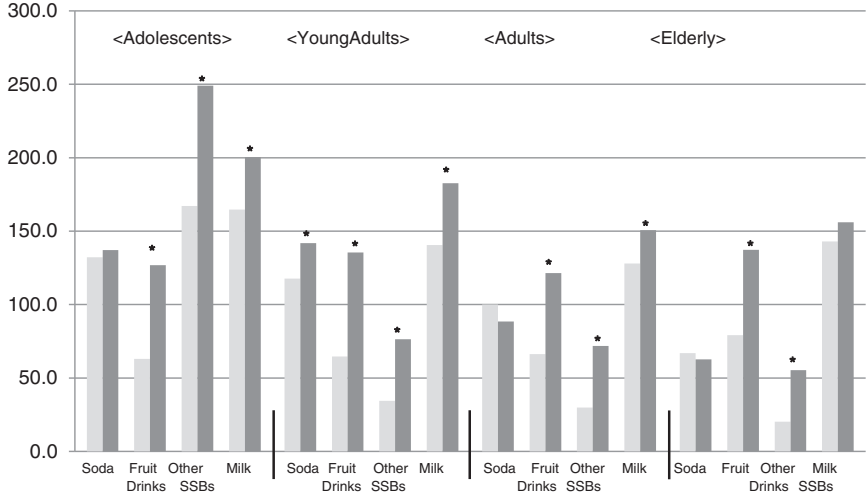

Notes: Adolescents, young adults, adults, and the elderly represent sample persons aged 12-19 years (N=1,293), 20-34 years (N=4,111), 35-64 years (N=9,968), and 65 years or older (N=2,349), respectively. Among those, this figure was prepared for consumers. Y axis represents for the amount of calorie intake. The light and dark grey bars in each beverage type represent for 2001 and 2009, respectively. \* indicates that the values between 2001 and 2009 were statistically significantly different at the 5% level.
